# Supplementary material for: An Arabidopsis Example of Association Mapping in Structured Samples
Source: PLOS journal article supplement (doi:10.1371/journal.pgen.0030004), 2007-01-01
Supplement: S2 (10.1371/journal.pgen.0030004.s002) [file journal.pgen.0030004.s002]

**Table S2.** Linear model analysis of candidate polymorphisms with and without cofactors.

| Phenotype       | $X^a$            |                   |                   | Latitude     | FRI          | $X^b$            |                   |                   |
|-----------------|------------------|-------------------|-------------------|--------------|--------------|------------------|-------------------|-------------------|
|                 | raw <sup>c</sup> | %SNP <sup>d</sup> | %HAP <sup>e</sup> |              |              | raw <sup>c</sup> | %SNP <sup>d</sup> | %HAP <sup>e</sup> |
| $X = CRY2$ [32] |                  |                   |                   |              |              |                  |                   |                   |
| LD              | 0.11             | (0.35)            | (0.54)            | <b>2E-07</b> | <b>6E-07</b> | <b>4E-04</b>     | (0.11)            | (0.29)            |
| LDV             | <b>0.03</b>      | (0.19)            | (0.36)            | <b>1E-06</b> | <b>0.01</b>  | <b>1E-03</b>     | (0.09)            | (0.23)            |
| SD              | 0.11             | (0.32)            | (0.51)            | <b>3E-04</b> | <b>8E-05</b> | <b>3E-03</b>     | (0.11)            | (0.28)            |
| SDV             | <b>0.01</b>      | (0.07)            | (0.16)            | <b>3E-06</b> | 0.13         | <b>6E-04</b>     | <b>(0.04)</b>     | (0.12)            |
| JIC0W           | 0.25             | (0.40)            | (0.51)            | 0.07         | <b>1E-05</b> | <b>3E-03</b>     | (0.05)            | (0.12)            |
| JIC2W           | 0.11             | (0.28)            | (0.41)            | <b>4E-04</b> | <b>1E-05</b> | <b>6E-04</b>     | (0.07)            | (0.17)            |
| JIC4W           | 0.07             | (0.24)            | (0.41)            | <b>8E-05</b> | <b>7E-04</b> | <b>8E-04</b>     | (0.07)            | (0.21)            |
| JIC8W           | <b>0.03</b>      | (0.12)            | (0.22)            | 0.17         | <b>0.02</b>  | <b>1E-03</b>     | <b>(0.03)</b>     | (0.08)            |
| ±V (LD)         | 0.31             | (0.54)            | (0.71)            | <b>3E-05</b> | <b>5E-07</b> | <b>0.01</b>      | (0.18)            | (0.37)            |
| ±V (SD)         | 0.22             | (0.32)            | (0.40)            | <b>0.03</b>  | <b>3E-03</b> | 0.37             | (0.50)            | (0.59)            |
| SD/LD (V)       | 0.08             | (0.18)            | (0.25)            | 0.07         | 0.44         | 0.12             | (0.23)            | (0.34)            |
| VERN            | 0.61             | (0.72)            | (0.80)            | 0.09         | <b>3E-05</b> | 0.44             | (0.63)            | (0.75)            |
| JIC/USC         | 0.18             | (0.25)            | (0.31)            | <b>0.02</b>  | 0.61         | 0.14             | (0.22)            | (0.29)            |
| JIC/USC (V)     | 0.18             | (0.36)            | (0.52)            | <b>8E-03</b> | <b>2E-03</b> | <b>0.02</b>      | (0.13)            | (0.30)            |
| FRI             | 0.10             | (0.19)            | (0.27)            | 0.21         | <b>1E-11</b> | <b>2E-03</b>     | (0.06)            | (0.12)            |
| FLC             | 0.73             | (0.80)            | (0.85)            | 0.90         | <b>9E-09</b> | 0.73             | (0.84)            | (0.90)            |
| $X = FLC$ [33]  |                  |                   |                   |              |              |                  |                   |                   |
| LD              | 0.22             | (0.50)            | (0.65)            | <b>1E-08</b> | <b>2E-06</b> | 0.52             | (0.79)            | (0.91)            |
| LDV             | 0.65             | (0.79)            | (0.88)            | <b>1E-07</b> | <b>0.01</b>  | 0.98             | (0.99)            | (1.00)            |
| SD              | <b>0.03</b>      | (0.18)            | (0.33)            | <b>1E-05</b> | <b>1E-04</b> | 0.07             | (0.35)            | (0.56)            |
| SDV             | <b>0.03</b>      | (0.14)            | (0.24)            | <b>5E-08</b> | 0.16         | <b>0.02</b>      | (0.17)            | (0.33)            |
| JIC0W           | 0.10             | (0.21)            | (0.31)            | <b>0.01</b>  | <b>3E-05</b> | 0.21             | (0.42)            | (0.61)            |
| JIC2W           | 0.05             | (0.19)            | (0.33)            | <b>3E-05</b> | <b>3E-05</b> | 0.17             | (0.47)            | (0.64)            |
| JIC4W           | 0.06             | (0.22)            | (0.38)            | <b>5E-06</b> | <b>8E-04</b> | 0.12             | (0.41)            | (0.62)            |
| JIC8W           | 0.07             | (0.21)            | (0.34)            | 0.05         | <b>0.01</b>  | 0.17             | (0.36)            | (0.51)            |
| ±V (LD)         | 0.19             | (0.42)            | (0.59)            | <b>2E-06</b> | <b>2E-06</b> | 0.49             | (0.74)            | (0.87)            |
| ±V (SD)         | 0.73             | (0.78)            | (0.83)            | <b>0.01</b>  | <b>2E-03</b> | 0.36             | (0.50)            | (0.59)            |
| SD/LD (V)       | <b>3E-03</b>     | <b>(0.02)</b>     | <b>(0.03)</b>     | <b>0.01</b>  | 0.27         | <b>1E-03</b>     | <b>(0.01)</b>     | <b>(0.02)</b>     |
| VERN            | 0.10             | (0.23)            | (0.34)            | <b>0.05</b>  | <b>6E-05</b> | 0.29             | (0.49)            | (0.66)            |
| JIC/USC         | <b>0.02</b>      | <b>(0.05)</b>     | (0.06)            | <b>0.03</b>  | 0.58         | <b>0.02</b>      | (0.05)            | (0.07)            |
| JIC/USC (V)     | <b>0.01</b>      | (0.10)            | (0.25)            | <b>1E-03</b> | <b>2E-03</b> | <b>0.04</b>      | (0.19)            | (0.39)            |
| FRI             | 0.07             | (0.15)            | (0.23)            | <b>0.05</b>  | <b>4E-10</b> | 0.35             | (0.54)            | (0.71)            |
| FLC             | <b>0.03</b>      | (0.09)            | (0.13)            | 0.69         | <b>2E-08</b> | 0.16             | (0.37)            | (0.54)            |
| $X = PHYC$ [34] |                  |                   |                   |              |              |                  |                   |                   |
| LD              | 0.10             | (0.33)            | (0.53)            | <b>1E-07</b> | <b>1E-06</b> | <b>0.01</b>      | (0.26)            | (0.51)            |
| LDV             | 0.68             | (0.81)            | (0.89)            | <b>7E-08</b> | <b>0.01</b>  | 0.49             | (0.74)            | (0.87)            |
| SD              | 0.21             | (0.46)            | (0.63)            | <b>1E-04</b> | <b>1E-04</b> | 0.12             | (0.43)            | (0.64)            |
| SDV             | 0.13             | (0.31)            | (0.46)            | <b>1E-06</b> | 0.14         | 0.07             | (0.29)            | (0.49)            |
| JIC0W           | 0.39             | (0.54)            | (0.66)            | <b>0.02</b>  | <b>3E-05</b> | 0.16             | (0.37)            | (0.54)            |
| JIC2W           | 0.26             | (0.46)            | (0.57)            | <b>1E-04</b> | <b>3E-05</b> | 0.07             | (0.32)            | (0.50)            |
| JIC4W           | 0.60             | (0.78)            | (0.88)            | <b>7E-06</b> | <b>1E-03</b> | 0.36             | (0.68)            | (0.82)            |
| JIC8W           | 0.82             | (0.88)            | (0.94)            | <b>0.04</b>  | <b>0.02</b>  | 0.94             | (0.97)            | (0.98)            |
| ±V (LD)         | 0.03             | (0.17)            | (0.32)            | <b>4E-05</b> | <b>5E-07</b> | <b>2E-03</b>     | (0.13)            | (0.30)            |
| ±V (SD)         | 0.68             | (0.75)            | (0.80)            | <b>0.02</b>  | <b>3E-03</b> | 0.68             | (0.76)            | (0.83)            |
| SD/LD (V)       | 0.08             | (0.17)            | (0.24)            | 0.08         | 0.44         | 0.09             | (0.20)            | (0.29)            |
| VERN            | 0.06             | (0.15)            | (0.26)            | 0.16         | <b>2E-05</b> | <b>0.02</b>      | (0.12)            | (0.23)            |
| JIC/USC         | 0.69             | (0.72)            | (0.79)            | <b>0.03</b>  | 0.62         | 0.68             | (0.71)            | (0.79)            |
| JIC/USC (V)     | 0.49             | (0.67)            | (0.77)            | <b>2E-03</b> | <b>2E-03</b> | 0.32             | (0.57)            | (0.73)            |
| FRI             | 0.70             | (0.74)            | (0.83)            | 0.09         | <b>8E-11</b> | 0.60             | (0.73)            | (0.86)            |
| FLC             | 0.59             | (0.69)            | (0.76)            | 0.98         | <b>7E-09</b> | 0.32             | (0.52)            | (0.68)            |

<sup>a</sup>Model: Phenotype  $\sim X$ .<sup>b</sup>Model: Phenotype  $\sim$  Latitude + FRI +  $X$ .<sup>c</sup>Nominal p-value.<sup>d</sup>Percentile of p-value compared to genome-wide SNP-based tests.<sup>e</sup>Percentile of p-value compared to genome-wide haplotype-based tests.
