# Supplementary material for: An Arabidopsis Example of Association Mapping in Structured Samples
Source: PLOS journal article supplement (doi:10.1371/journal.pgen.0030004), 2007-01-01
Supplement: S2 (10.1371/journal.pgen.0030004.s002) [file journal.pgen.0030004.s002]

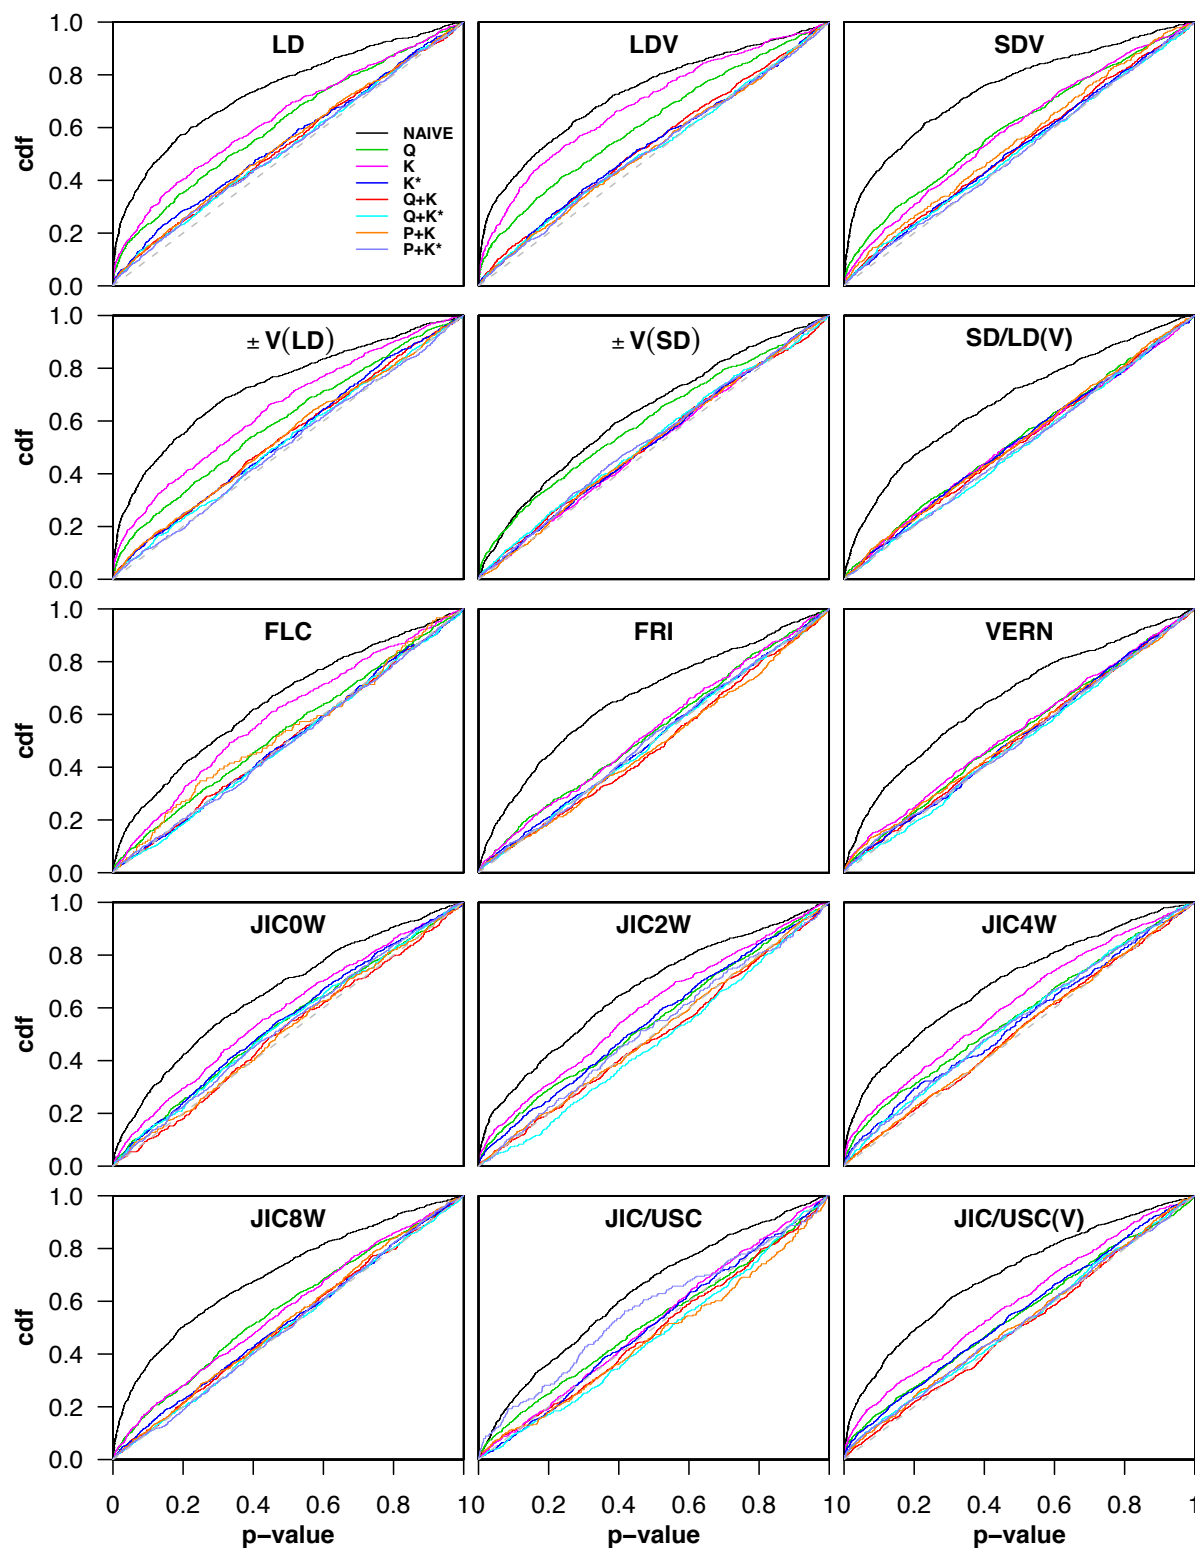

Figure S2: The cumulative distribution of p-values in genome-wide scans for all phenotypes. The different curves correspond to different approaches for correcting for population structure (described in Table 2). Without correction for population structure, all p-value distributions are strongly skewed towards significance. These results are for associations between phenotype and haplotypes (cf. Figure 2).
