# Supplementary material for: An Arabidopsis Example of Association Mapping in Structured Samples
Source: PLOS journal article supplement (doi:10.1371/journal.pgen.0030004), 2007-01-01
Supplement: S3 (10.1371/journal.pgen.0030004.s003) [file journal.pgen.0030004.s003]

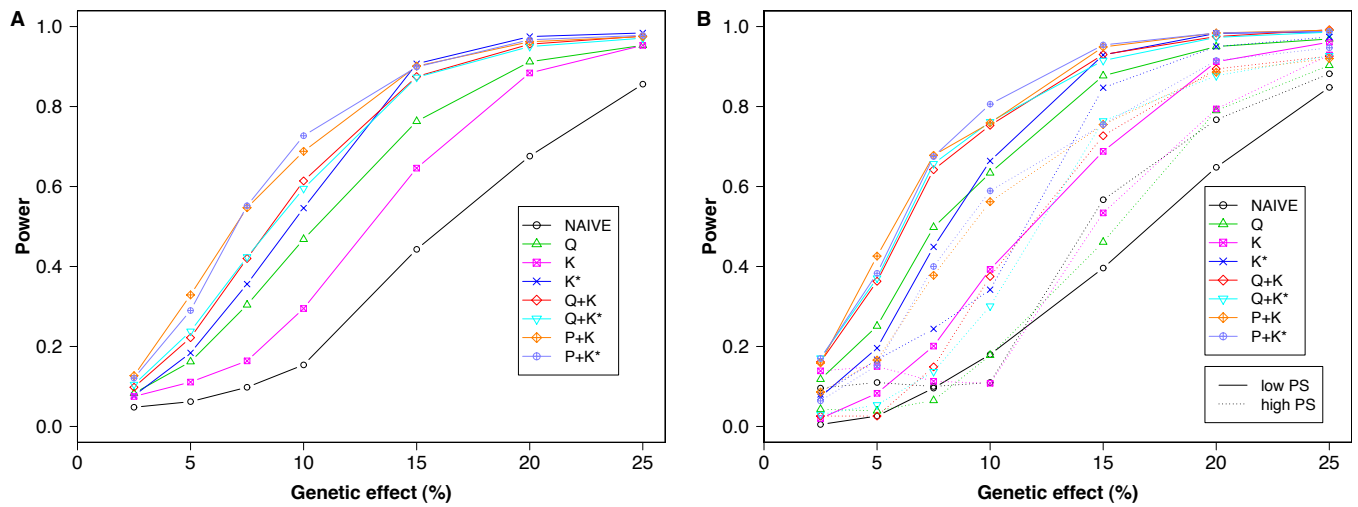

Figure S3: Power of the different methods to detect QTN using a 5% significance level, calculated as in Figure 3 but using haplotype markers. (A) Power calculated across all simulations. (B) Power calculated separately for QTN that showed strong and weak correlation with population structure.
